# Supplementary material
Source: PubMed Central journal article supplement (PMC4526442)

## **SUPPLEMENTAL MATERIAL**

## Supplemental Tables and Figures

Supplemental Figure 1. Venn diagram demonstrating the overlap between abnormal LS, LVH, and elevated E/E' patients among patients with all 3 measures available among study participants with LVEF  $\geq$ 55% (n=259).

Supplemental Table 1. Clinical characteristics among patients in the TOPCAT trial without versus with strain data.

|                                             | <b>No Strain Data<br/>(n=2,998)</b> | <b>Strain Data<br/>(n=447)</b> | <b>P value</b> |
|---------------------------------------------|-------------------------------------|--------------------------------|----------------|
| Age (years)                                 | 68.3 ± 9.6                          | 70.3 ± 9.8                     | <0.0001        |
| Female                                      | 1535 (51.2%)                        | 240 (53.7%)                    | 0.33           |
| White                                       | 2703 (90.2%)                        | 359 (80.3%)                    | <0.0001        |
| Enrollment in<br>Russia/Georgia             | 1571 (52.4%)                        | 107 (23.9%)                    | <0.0001        |
| Enrollment Strata: Prior<br>Hospitalization | 2175 (72.5%)                        | 289 (64.7%)                    | 0.0006         |
| <b><i>Co-morbidities</i></b>                |                                     |                                |                |
| Hypertension                                | 2736 (91.3%)                        | 411 (92.2%)                    | 0.56           |
| Myocardial Infarction                       | 778 (26.0%)                         | 115 (25.8%)                    | 0.93           |
| Coronary Revascularization                  | 683 (22.8%)                         | 130 (29.1%)                    | 0.003          |
| Stroke                                      | 218 (7.3%)                          | 47 (10.5%)                     | 0.016          |
| Atrial Fibrillation                         | 1021 (34.1%)                        | 193 (43.3%)                    | 0.0001         |
| Diabetes                                    | 947 (31.6%)                         | 171 (38.3%)                    | 0.005          |
| Obesity                                     | 1640 (54.9%)                        | 262 (58.7%)                    | 0.12           |
| NYHA Functional Class                       |                                     |                                | <0.0001        |
| 1                                           | 76 (2.5%)                           | 33 (7.4%)                      |                |
| 2                                           | 1953 (65.2%)                        | 241 (54.2%)                    |                |
| 3                                           | 953 (31.8%)                         | 168 (37.8%)                    |                |

|   |           |          |
|---|-----------|----------|
| 4 | 12 (0.4%) | 3 (0.7%) |
|---|-----------|----------|

***Physical Characteristics***

|                                    |             |             |         |
|------------------------------------|-------------|-------------|---------|
| BMI (kg/m <sup>2</sup> )           | 32.1 ± 7.3  | 32.5 ± 6.9  | 0.28    |
| Heart rate (bpm)                   | 68.2 ± 12.0 | 67.8 ± 11.5 | 0.53    |
| Systolic blood pressure<br>(mmHg)  | 130 ± 14    | 126 ± 15    | <0.0001 |
| Diastolic blood pressure<br>(mmHg) | 76 ± 11     | 72 ± 11     | <0.0001 |

***Laboratory Values***

|                                        |             |             |         |
|----------------------------------------|-------------|-------------|---------|
| eGFR (mL/min per 1.73 m <sup>2</sup> ) | 67.9 ± 19.9 | 66.1 ± 21.5 | 0.08    |
| Creatinine (mg/dL)                     | 1.09 ± 0.29 | 1.14 ± 0.34 | 0.0008  |
| Hematocrit (%)                         | 40.3 ± 5.1  | 38.9 ± 4.7  | <0.0001 |

---

Supplemental Table 2. Clinical characteristics among patients in the TOPCAT echocardiography study without versus with acceptable image quality for strain analysis. Unacceptable image quality was defined as lack of a full cardiac cycle, more than 2 segment dropout, analog format or digital format other than DICOM, missing view, or significant foreshortening of the left ventricle.

|                                             | <b>Inadequate Image<br/>Quality<br/>(n=488)</b> | <b>Adequate Image<br/>Quality<br/>(n=447)</b> | <b>P value</b> |
|---------------------------------------------|-------------------------------------------------|-----------------------------------------------|----------------|
| Age (years)                                 | 69.56 ± 9.61                                    | 70.27 ± 9.79                                  | 0.27           |
| Female                                      | 222 (45.5%)                                     | 240 (53.7%)                                   | 0.01           |
| White                                       | 411 (84.2%)                                     | 359 (80.3%)                                   | 0.12           |
| Enrollment in Russia/Georgia                | 174 (35.7%)                                     | 107 (23.9%)                                   | <0.0001        |
| Enrollment Strata: Prior<br>Hospitalization | 333 (68.2%)                                     | 289 (64.7%)                                   | 0.25           |
| <b><i>Co-morbidities</i></b>                |                                                 |                                               |                |
| Hypertension                                | 443 (90.8%)                                     | 411 (92.2%)                                   | 0.45           |
| Myocardial Infarction                       | 138 (28.3%)                                     | 115 (25.8%)                                   | 0.39           |
| Coronary Revascularization                  | 134 (27.5%)                                     | 130 (29.1%)                                   | 0.57           |
| Stroke                                      | 30 (6.1%)                                       | 47 (10.5%)                                    | 0.01           |
| Atrial Fibrillation                         | 166 (34.0%)                                     | 193 (43.3%)                                   | 0.004          |
| Diabetes                                    | 202 (41.4%)                                     | 171 (38.3%)                                   | 0.34           |
| Obesity                                     | 276 (56.7%)                                     | 262 (58.7%)                                   | 0.52           |
| NYHA Functional Class                       |                                                 |                                               | 0.05           |

|   |             |             |
|---|-------------|-------------|
| 1 | 19 (3.9%)   | 33 (7.4%)   |
| 2 | 296 (60.8%) | 241 (54.2%) |
| 3 | 167 (34.3%) | 168 (37.8%) |
| 4 | 5 (1.0%)    | 3 (0.7%)    |

***Physical Characteristics***

|                                    |                |                |        |
|------------------------------------|----------------|----------------|--------|
| BMI (kg/m <sup>2</sup> )           | 32.80 ± 8.05   | 32.46 ± 6.91   | 0.49   |
| Heart rate (bpm)                   | 68.35 ± 13.02  | 67.78 ± 11.48  | 0.48   |
| Systolic blood pressure<br>(mmHg)  | 129.73 ± 14.35 | 126.37 ± 15.03 | 0.0005 |
| Diastolic blood pressure<br>(mmHg) | 74.53 ± 10.53  | 72.48 ± 10.85  | 0.003  |

***Laboratory Values***

|                                        |               |               |      |
|----------------------------------------|---------------|---------------|------|
| eGFR (mL/min per 1.73 m <sup>2</sup> ) | 66.73 ± 21.74 | 66.08 ± 21.51 | 0.65 |
| Creatinine (mg/dL)                     | 1.13 ± 0.31   | 1.14 ± 0.34   | 0.70 |
| Hematocrit (%)                         | 39.60 ± 5.31  | 38.91 ± 4.67  | 0.04 |

---

Supplemental Table 3. Association of LS with cardiovascular outcomes (primary composite outcomes, CV death, incident HF hospitalization, and total number of HF hospitalizations) in univariate and multivariable analysis among 354 patients with LVEF  $\geq 55\%$ . Multivariable analysis is adjusted for the following variables: Model 1: age, gender, race, randomization strata (prior HF hospitalization or biomarker criteria), region of enrollment (Americas versus Russia or Georgia), randomized treatment assignment, core lab LVEF, history of atrial fibrillation, heart rate, New York Heart Association class, history of stroke, creatinine, and hematocrit; Model 2: Model 1 + LV mass, LVESVi; Model 3: Model 2 + E/E' ratio. For dichotomous analysis, abnormal LS was defined as LS  $> -15.8\%$  (see text for details). LS is shown as absolute value.

|                | Normal LS<br>( $\geq 15.8$ ) |               |               | Abnormal LS<br>( $< 15.8$ ) |               |                  | Dichotomous        |          | Continuous (per 1% ↓) |          |
|----------------|------------------------------|---------------|---------------|-----------------------------|---------------|------------------|--------------------|----------|-----------------------|----------|
|                | <i>N</i>                     | <i>Events</i> | <i>Rate</i>   | <i>N</i>                    | <i>Events</i> | <i>Rate</i>      | <i>HR (95% CI)</i> | <i>P</i> | <i>HR (95% CI)</i>    | <i>P</i> |
| <b>Primary</b> |                              |               |               |                             |               |                  |                    |          |                       |          |
| Unadjusted     | 202                          | 36            | 6.1 (4.4-8.5) | 152                         | 51            | 13.5 (10.3-17.8) | 2.18 (1.42-3.34)   | <0.001   | 1.20 (1.12-1.28)      | <0.001   |
| Model 1        | 190                          | 35            | 6.3 (4.6-8.8) | 148                         | 50            | 13.6 (10.3-17.9) | 2.38 (1.42-3.97)   | 0.001    | 1.21 (1.12-1.32)      | <0.001   |
| Model 2        | 146                          | 27            | 6.4 (4.4-9.3) | 103                         | 34            | 13.6 (9.7-19.1)  | 2.37 (1.30-4.33)   | 0.005    | 1.24 (1.11-1.39)      | <0.001   |

| <b>CV death</b>         |     |    |               |     |    |                |                            |                 |                            |                 |
|-------------------------|-----|----|---------------|-----|----|----------------|----------------------------|-----------------|----------------------------|-----------------|
| Unadjusted              | 202 | 14 | 2.2 (1.3-3.8) | 152 | 26 | 6.1 (4.1-8.9)  | 2.80 (1.46-5.37)           | 0.002           | 1.25 (1.13-1.39)           | <0.001          |
| Model 1                 | 190 | 14 | 2.4 (1.4-4.0) | 148 | 25 | 6.0 (4.0-8.8)  | 3.60 (1.66-7.81)           | 0.001           | 1.34 (1.19-1.51)           | <0.001          |
| Model 2                 | 146 | 11 | 2.4 (1.3-4.4) | 103 | 20 | 7.1 (4.6-11.0) | 4.13 (1.67-10.2)           | 0.002           | 1.46 (1.23-1.73)           | <0.001          |
| <b>Incident HF Hosp</b> |     |    |               |     |    |                |                            |                 |                            |                 |
| Unadjusted              | 202 | 25 | 4.3 (2.9-6.3) | 152 | 36 | 9.6 (6.9-13.2) | 2.17 (1.30-3.62)           | 0.003           | 1.19 (1.10-1.29)           | <0.001          |
| Model 1                 | 190 | 24 | 4.4 (2.9-6.5) | 148 | 36 | 9.8 (7.1-13.6) | 2.39 (1.27-4.50)           | 0.007           | 1.20 (1.09-1.32)           | <0.001          |
| Model 2                 | 146 | 18 | 4.3 (2.7-6.8) | 103 | 24 | 9.6 (6.5-14.4) | 2.64 (1.25-5.58)           | 0.011           | 1.24 (1.07-1.43)           | 0.004           |
| <b>Total HF Hosp</b>    |     |    |               |     |    |                |                            |                 |                            |                 |
|                         |     |    |               |     |    |                | <i><b>IRR (95% CI)</b></i> | <i><b>P</b></i> | <i><b>IRR (95% CI)</b></i> | <i><b>P</b></i> |
| Unadjusted              | 202 | -  | -             | 152 | -  | -              | 2.68 (1.37-5.26)           | 0.004           | 1.24 (1.11-1.39)           | <0.001          |
| Model 1                 | 190 | -  | -             | 148 | -  | -              | 3.80 (1.74-8.29)           | 0.001           | 1.31 (1.15-1.50)           | <0.001          |
| Model 2                 | 146 | -  | -             | 103 | -  | -              | 5.27 (2.01-13.8)           | 0.001           | 1.34 (1.14-1.58)           | <0.001          |



Supplemental Table 4. Association of LS with cardiovascular outcomes (primary composite outcomes, CV death, incident HF hospitalization, and total number of HF hospitalizations) stratified by region of enrollment: the Americas (United States, Canada, Argentina, Brazil) versus Russia or Georgia. Multivariable analysis is adjusted for the following variables: Model 1: age, gender, race, randomization strata (prior HF hospitalization or biomarker criteria), randomized treatment assignment, core lab LVEF, history of atrial fibrillation, heart rate, New York Heart Association class, history of stroke, creatinine, and hematocrit; Model 2: Model 1 + LV mass, LVESVi; Model 3: Model 2 + E/E' ratio. Given the small number of events in Russia and Georgia, only unadjusted analyses are presented for this region. The number of HF hospitalizations was insufficient to assess the association of LS with total number of HF hospitalizations in Russia and Georgia. For dichotomous analysis, abnormal LS was defined as an absolute LS <15.8% (see text for details).

|                                                                                     | Normal LS<br>(≥15.8) |               |                | Abnormal LS<br>(<15.8) |               |                  | Dichotomous        |          | Continuous (per 1% ↓) |          |
|-------------------------------------------------------------------------------------|----------------------|---------------|----------------|------------------------|---------------|------------------|--------------------|----------|-----------------------|----------|
|                                                                                     | <i>N</i>             | <i>Events</i> | <i>Rate</i>    | <i>N</i>               | <i>Events</i> | <i>Rate</i>      | <i>HR (95% CI)</i> | <i>P</i> | <i>HR (95% CI)</i>    | <i>P</i> |
| <b><i>Enrollment in the United States, Canada, Argentina, or Brazil (n=340)</i></b> |                      |               |                |                        |               |                  |                    |          |                       |          |
| <b>Primary</b>                                                                      |                      |               |                |                        |               |                  |                    |          |                       |          |
| Unadjusted                                                                          | 160                  | 33            | 7.5 (5.3-10.5) | 180                    | 67            | 15.4 (12.1-19.6) | 2.05 (1.35-3.11)   | 0.001    | 1.13 (1.07-1.19)      | <0.001   |

|                         |     |    |                |     |    |                  |                  |       |                  |        |
|-------------------------|-----|----|----------------|-----|----|------------------|------------------|-------|------------------|--------|
| Model 1                 | 151 | 32 | 7.6 (5.4-10.8) | 177 | 66 | 15.5 (12.1-19.7) | 2.05 (1.25-3.34) | 0.004 | 1.14 (1.06-1.23) | <0.001 |
| Model 2                 | 149 | 32 | 7.7 (5.5-10.9) | 175 | 66 | 15.7 (12.3-19.9) | 1.91 (1.14-3.18) | 0.013 | 1.13 (1.04-1.22) | 0.002  |
| Model 3                 | 107 | 24 | 8.3 (5.5-12.3) | 120 | 47 | 17.1 (12.8-22.7) | 1.96 (1.08-3.56) | 0.027 | 1.11 (1.01-1.22) | 0.026  |
| <b>CV death</b>         |     |    |                |     |    |                  |                  |       |                  |        |
| Unadjusted              | 160 | 12 | 2.5 (1.4-4.41) | 180 | 30 | 5.9 (4.1-8.5)    | 2.40 (1.23-4.70) | 0.010 | 1.15 (1.06-1.25) | 0.001  |
| Model 1                 | 151 | 12 | 2.6 (1.5-4.6)  | 177 | 29 | 5.8 (4.0-8.3)    | 2.53 (1.15-5.58) | 0.021 | 1.22 (1.09-1.36) | 0.001  |
| Model 2                 | 149 | 12 | 2.7 (1.5-4.7)  | 175 | 29 | 5.9 (4.1-8.4)    | 2.50 (1.11-5.64) | 0.027 | 1.22 (1.09-1.37) | 0.001  |
| Model 3                 | 107 | 9  | 2.8 (1.5-5.4)  | 120 | 22 | 6.7 (4.4-10.2)   | 2.80 (1.07-7.36) | 0.037 | 1.26 (1.08-1.46) | 0.003  |
| <b>Incident HF Hosp</b> |     |    |                |     |    |                  |                  |       |                  |        |
| Unadjusted              | 160 | 24 | 5.4 (3.6-8.1)  | 180 | 50 | 11.5 (8.7-15.1)  | 2.08 (1.28-3.38) | 0.003 | 1.12 (1.05-1.19) | 0.001  |
| Model 1                 | 151 | 23 | 5.5 (3.7-8.3)  | 177 | 50 | 11.7 (8.8-15.4)  | 2.29 (1.29-4.04) | 0.004 | 1.13 (1.04-1.23) | 0.004  |
| Model 2                 | 149 | 23 | 5.6 (3.7-8.4)  | 175 | 50 | 11.8 (9.0-15.6)  | 2.21 (1.22-3.99) | 0.009 | 1.12 (1.02-1.22) | 0.012  |
| Model 3                 | 107 | 17 | 5.8 (3.6-9.4)  | 120 | 36 | 13.0 (9.4-18.0)  | 2.43 (1.23-4.83) | 0.011 | 1.10 (0.99-1.23) | 0.082  |

| <b>Total HF Hosp</b>                           |     |   |               |     |    |                | <b>IRR (95% CI)</b> | <b>P</b> | <b>IRR (95% CI)</b> | <b>P</b> |
|------------------------------------------------|-----|---|---------------|-----|----|----------------|---------------------|----------|---------------------|----------|
| Unadjusted                                     | 160 | - | -             | 180 | -  | -              | 2.18 (1.20-3.95)    | 0.011    | 1.15 (1.04-1.26)    | 0.005    |
| Model 1                                        | 151 | - | -             | 177 | -  | -              | 3.65 (1.78-7.46)    | <0.001   | 1.20 (1.08-1.34)    | 0.001    |
| Model 2                                        | 149 | - | -             | 175 | -  | -              | 3.76 (1.82-7.76)    | <0.001   | 1.21 (1.08-1.36)    | 0.001    |
| Model 3                                        | 107 | - | -             | 120 | -  | -              | 5.74(2.27-14.5)     | <0.001   | 1.21 (1.05-1.39)    | 0.008    |
| <b>Enrollment in Russia or Georgia (n=107)</b> |     |   |               |     |    |                |                     |          |                     |          |
| <b>Primary</b>                                 |     |   |               |     |    |                |                     |          |                     |          |
| Unadjusted                                     | 56  | 4 | 2.1 (0.8-5.6) | 51  | 11 | 7.8 (4.2-13.7) | 3.31(1.05-10.4)     | 0.04     | 1.16 (1.02-1.31)    | 0.025    |
| <b>CV death</b>                                |     |   |               |     |    |                |                     |          |                     |          |
| Unadjusted                                     | 56  | 3 | 1.6 (0.5-4.9) | 51  | 9  | 5.9 (3.1-11.3) | 3.56 (0.96-13.1)    | 0.06     | 1.20 (1.04-1.38)    | 0.015    |
| <b>Incident HF Hosp</b>                        |     |   |               |     |    |                |                     |          |                     |          |

---

|            |    |   |               |    |   |               |                  |      |                  |      |
|------------|----|---|---------------|----|---|---------------|------------------|------|------------------|------|
| Unadjusted | 56 | 1 | 0.5 (0.1-3.8) | 51 | 3 | 2.1 (0.7-6.4) | 3.53 (0.37-34.0) | 0.27 | 1.13 (0.87-1.45) | 0.36 |
|------------|----|---|---------------|----|---|---------------|------------------|------|------------------|------|

---

Supplemental Table 5. Association of LS with cardiovascular outcomes (primary composite outcomes, CV death, incident HF hospitalization, and total number of HF hospitalizations) in univariate and multivariable analysis using multiple imputation by chained equations to account for variable missing data. N=444 for all analyses using the overall study population; N=341 for all analyses using the subgroup with LVEF  $\geq$ 55%. Multivariable analysis is adjusted for the following variables: Model 1: age, gender, race, randomization strata (prior HF hospitalization or biomarker criteria), randomized treatment assignment, core lab LVEF, history of atrial fibrillation, heart rate, New York Heart Association class, history of stroke, creatinine, and hematocrit; Model 2: Model 1 + LV mass, LVESVi; Model 3: Model 2 + E/E' ratio. For dichotomous analysis, abnormal LS was defined as an absolute LS <15.8%.

|                                                | <b>Dichotomous</b> |          | <b>Continuous (per 1% ↓)</b> |          |
|------------------------------------------------|--------------------|----------|------------------------------|----------|
|                                                | <i>HR (95% CI)</i> | <i>P</i> | <i>HR (95% CI)</i>           | <i>P</i> |
| <b><i>Overall Study Population (n=444)</i></b> |                    |          |                              |          |
| <b>Primary (events = 115)</b>                  |                    |          |                              |          |
| Model 1                                        | 2.16 (1.38-3.39)   | 0.001    | 1.15 (1.08-1.23)             | <0.001   |
| Model 2                                        | 2.17 (1.36-3.45)   | 0.001    | 1.15 (1.07-1.23)             | <0.001   |
| Model 3                                        | 2.10 (1.32-3.34)   | 0.002    | 1.14 (1.06-1.22)             | 0.001    |

|                                                        |                  |       |                  |        |
|--------------------------------------------------------|------------------|-------|------------------|--------|
| <b>CV death (events = 54)</b>                          |                  |       |                  |        |
| Model 1                                                | 2.92 (1.47-5.79) | 0.002 | 1.23 (1.12-1.36) | <0.001 |
| Model 2                                                | 3.21 (1.59-6.47) | 0.001 | 1.25 (1.13-1.38) | <0.001 |
| Model 3                                                | 3.12 (1.55-6.31) | 0.001 | 1.24 (1.12-1.38) | <0.001 |
| <b>Incident HF Hosp<br/>(events = 78)</b>              |                  |       |                  |        |
| Model 1                                                | 2.10 (1.22-3.63) | 0.008 | 1.12 (1.04-1.22) | 0.005  |
| Model 2                                                | 2.04 (1.16-3.58) | 0.014 | 1.11 (1.02-1.21) | 0.014  |
| Model 3                                                | 1.93 (1.10-3.39) | 0.022 | 1.09 (0.99-1.19) | 0.066  |
| <b>Subgroup with LVEF <math>\geq</math>55% (n=351)</b> |                  |       |                  |        |
| <b>Primary (events = 87)</b>                           |                  |       |                  |        |
| Model 1                                                | 2.21 (1.37-3.58) | 0.001 | 1.19 (1.11-1.28) | <0.001 |
| Model 2                                                | 2.37 (1.42-3.93) | 0.001 | 1.22 (1.13-1.32) | <0.001 |
| Model 3                                                | 2.26 (1.36-3.78) | 0.002 | 1.22 (1.11-1.33) | <0.001 |

**CV death (events = 40)**

|         |                  |       |                  |        |
|---------|------------------|-------|------------------|--------|
| Model 1 | 3.05 (1.45-6.41) | 0.003 | 1.27 (1.14-1.42) | <0.001 |
| Model 2 | 3.55 (1.66-7.62) | 0.001 | 1.33 (1.18-1.50) | <0.001 |
| Model 3 | 3.48 (1.61-7.52) | 0.002 | 1.35 (1.18-1.54) | <0.001 |

**Incident HF Hosp***(events = 61)*

|         |                  |       |                  |        |
|---------|------------------|-------|------------------|--------|
| Model 1 | 2.21 (1.23-3.99) | 0.008 | 1.19 (1.09-1.30) | <0.001 |
| Model 2 | 2.26 (1.21-4.22) | 0.011 | 1.21 (1.09-1.33) | <0.001 |
| Model 3 | 2.12 (1.13-3.99) | 0.019 | 1.19 (1.07-1.33) | 0.001  |

Supplemental Table 6. Association of LS with the primary composite outcome of CV death, incident HF hospitalization, and aborted cardiac arrest in univariate and multivariable analysis among 259 patients with data for natriuretic peptide level. Multivariable analysis is adjusted for the following variables: Model 1: age, gender, race, randomization strata (prior HF hospitalization or biomarker criteria), region of enrollment (Americas versus Russia or Georgia), randomized treatment assignment, core lab LVEF, history of atrial fibrillation, heart rate, New York Heart Association class, history of stroke, creatinine, hematocrit, *and natriuretic peptide level*; Model 2: Model 1 + LV mass, LVESVi; Model 3: Model 2 + E/E' ratio. For dichotomous analysis, abnormal LS was defined as an absolute LS <15.8% (see text for details).

|                                                            | Normal LS<br>(≥15.8) |               |               | Abnormal LS<br>(<15.8) |               |                  | Dichotomous        |          | Continuous (per 1% ↓) |          |
|------------------------------------------------------------|----------------------|---------------|---------------|------------------------|---------------|------------------|--------------------|----------|-----------------------|----------|
|                                                            | <i>N</i>             | <i>Events</i> | <i>Rate</i>   | <i>N</i>               | <i>Events</i> | <i>Rate</i>      | <i>HR (95% CI)</i> | <i>P</i> | <i>HR (95% CI)</i>    | <i>P</i> |
| <b><i>Sub-group with data on BNP/NT-proBNP (n=259)</i></b> |                      |               |               |                        |               |                  |                    |          |                       |          |
| Unadjusted                                                 | 125                  | 21            | 6.0 (3.9-9.2) | 134                    | 43            | 14.4 (10.7-19.4) | 2.32 (1.37-3.91)   | 0.002    | 1.13 (1.05-1.21)      | 0.001    |
| Model 1                                                    | 117                  | 20            | 6.0 (3.9-9.3) | 132                    | 42            | 14.2 (10.5-19.2) | 2.07 (1.10-3.91)   | 0.024    | 1.12 (1.03-1.23)      | 0.011    |



|         |     |    |                |     |    |                  |                  |       |                  |       |
|---------|-----|----|----------------|-----|----|------------------|------------------|-------|------------------|-------|
| Model 2 | 115 | 20 | 6.1 (3.9-9.5)  | 131 | 42 | 14.4 (10.6-19.5) | 2.15 (1.13-4.10) | 0.020 | 1.13 (1.03-1.24) | 0.013 |
| Model 3 | 93  | 17 | 6.4 (4.0-10.3) | 96  | 32 | 15.1 (10.7-21.3) | 1.98 (0.94-4.17) | 0.072 | 1.11 (0.98-1.25) | 0.094 |

---

Supplemental Table 7. Incremental value of LS in predicting cardiovascular outcomes (primary composite outcomes, CV death, incident HF hospitalization, and total number of HF hospitalizations) beyond clinical and echocardiographic variables among 249 patients with LVEF  $\geq$ 55%. Clinical variables were: age, gender, race, randomization strata (prior HF hospitalization or biomarker criteria), region of enrollment (Americas versus Russia or Georgia), randomized treatment assignment, core lab LVEF, history of atrial fibrillation, heart rate, New York Heart Association class, history of stroke, creatinine, and hematocrit. Echocardiographic variables of LV structure were LV mass and LVESVi. Only individuals with no missing data for any clinical or echocardiographic variables were included.

|                             | <b>Base cross-validated C statistic</b> | <b>+LS cross-validated C statistic</b> | <b>P value</b> | <b>IDI (95% CI)</b> | <b>P value</b> | <b>NRI (95% CI)</b> | <b>P value</b> |
|-----------------------------|-----------------------------------------|----------------------------------------|----------------|---------------------|----------------|---------------------|----------------|
| <b>Primary (events =61)</b> |                                         |                                        |                |                     |                |                     |                |
| Clinical                    | 0.70 (0.64-0.77)                        | 0.75 (0.68-0.81)                       | 0.026          | 6.7 (1.3-14.8)      | 0.016          | 27.7 (-1.4-47.1)    | 0.056          |
| Clinical + structure        | 0.72 (0.66-0.79)                        | 0.76 (0.70-0.83)                       | 0.040          | 6.6 (1.1-13.8)      | 0.016          | 27.6 (2.8-48.4)     | 0.032          |
| Clinical + structure + E/E' | 0.73 (0.66-0.79)                        | 0.76 (0.69-0.82)                       | 0.14           | 5.6 (0.8-12.3)      | 0.016          | 26.6 (2.6-42.9)     | 0.020          |

**CV death (events = 31)**

|                             |                  |                  |       |                 |       |                  |       |
|-----------------------------|------------------|------------------|-------|-----------------|-------|------------------|-------|
| Clinical                    | 0.59 (0.48-0.71) | 0.68 (0.56-0.80) | 0.024 | 10.5 (2.2-22.5) | 0.02  | 37.8 (12.2-60.6) | 0.012 |
| Clinical + structure        | 0.61 (0.49-0.72) | 0.69 (0.57-0.81) | 0.042 | 10.9 (2.2-22.8) | 0.012 | 42.9 (10.0-62.4) | 0.016 |
| Clinical + structure + E/E' | 0.57 (0.45-0.69) | 0.70 (0.58-0.81) | 0.015 | 12.7 (2.9-24.2) | 0.02  | 41.3 (12.9-61.6) | 0.012 |

**HF Hosp (events = 42)**

|                             |                  |                  |      |                |       |                  |       |
|-----------------------------|------------------|------------------|------|----------------|-------|------------------|-------|
| Clinical                    | 0.74 (0.65-0.82) | 0.76 (0.68-0.84) | 0.20 | 6.2 (0.4-15.0) | 0.032 | 29.7 (-2.1-49.0) | 0.084 |
| Clinical + structure        | 0.75 (0.67-0.83) | 0.77 (0.70-0.85) | 0.15 | 6.3 (0.3-14.0) | 0.032 | 32.1 (-0.3-50.1) | 0.052 |
| Clinical + structure + E/E' | 0.75 (0.67-0.83) | 0.77 (0.69-0.85) | 0.20 | 4.5 (0.0-10.7) | 0.052 | 24.2 (-5.9-45.0) | 0.11  |

---

Supplemental Table 8. Baseline clinical and echocardiographic characteristics among patients with both baseline and follow-up LS values by treatment group (spironolactone versus placebo) enrolled in the Americas or in Russia and Georgia.

|                                             | Americas          |                 |         | Russia/Georgia    |                 |         |
|---------------------------------------------|-------------------|-----------------|---------|-------------------|-----------------|---------|
|                                             | Placebo<br>(n=34) | Spiro<br>(n=30) | P value | Placebo<br>(n=36) | Spiro<br>(n=31) | P value |
| Age (years)                                 | 73.6 ± 7.8        | 68.5 ± 10.2     | 0.02    | 68.9 ± 8.2        | 67.3 ± 8.6      | 0.42    |
| Female                                      | 16 (47%)          | 13 (43%)        | 0.77    | 21 (58%)          | 17 (55%)        | 0.77    |
| White                                       | 30 (88%)          | 20 (67%)        | 0.04    | 36 (100%)         | 31 (100%)       | -       |
| Enrollment Strata: Prior<br>Hospitalization | 15 (44%)          | 16 (53%)        | 0.46    | 30 (83%)          | 24 (77%)        | 0.54    |
| <b><i>Co-morbidities</i></b>                |                   |                 |         |                   |                 |         |
| Hypertension                                | 33 (97%)          | 28 (93%)        | 0.48    | 36 (100%)         | 26 (84%)        | 0.01    |

|                                        |            |            |      |            |            |      |
|----------------------------------------|------------|------------|------|------------|------------|------|
| Myocardial Infarction                  | 8 (24%)    | 5 (17%)    | 0.50 | 13 (36%)   | 17 (55%)   | 0.12 |
| Stroke                                 | 2 (6%)     | 3 (10%)    | 0.54 | 4 (11%)    | 6 (19%)    | 0.35 |
| Atrial Fibrillation                    | 20 (59%)   | 18 (60%)   | 0.92 | 13 (36%)   | 8 (26%)    | 0.36 |
| Diabetes                               | 14 (41%)   | 17 (57%)   | 0.22 | 4 (11%)    | 5 (16%)    | 0.55 |
| Obesity                                | 19 (56%)   | 23 (77%)   | 0.08 | 15 (42%)   | 14 (45%)   | 0.77 |
| NYHA Functional Class                  |            |            | 0.53 |            |            | 0.37 |
| 1                                      | 2 (6%)     | 3 (10%)    |      | 1 (3%)     | 2 (7%)     |      |
| 2                                      | 20 (59%)   | 20 (67%)   |      | 19 (53%)   | 16 (52%)   |      |
| 3                                      | 12 (35%)   | 7 (23%)    |      | 16 (44%)   | 11 (36%)   |      |
| 4                                      | 0          | 0          |      | 0          | 2 (7%)     |      |
| <b><i>Physical Characteristics</i></b> |            |            |      |            |            |      |
| BMI (kg/m <sup>2</sup> )               | 32.3 ± 8.3 | 35.5 ± 8.5 | 0.13 | 29.9 ± 4.4 | 30.4 ± 4.1 | 0.66 |

|                                          |              |              |      |              |              |      |
|------------------------------------------|--------------|--------------|------|--------------|--------------|------|
| Heart rate (bpm)                         | 69.8 ± 10.3  | 63.7 ± 12.3  | 0.03 | 67.4 ± 11.9  | 64.7 ± 10.5  | 0.33 |
| Systolic blood pressure (mmHg)           | 119.8 ± 15.9 | 124.3 ± 15.8 | 0.26 | 128.9 ± 10.7 | 128.4 ± 12.5 | 0.85 |
| <b><i>Laboratory Values</i></b>          |              |              |      |              |              |      |
| eGFR (mL/min per 1.73 m <sup>2</sup> )   | 61.5 ± 17.4  | 63.7 ± 22.3  | 0.65 | 73.1 ± 16.7  | 71.8 ± 16.0  | 0.75 |
| Creatinine (mg/dL)                       | 1.2 ± 0.3    | 1.2 ± 0.4    | 0.40 | 1.0 ± 0.2    | 1.0 ± 0.2    | 0.51 |
| Hematocrit (%)                           | 38.0 ± 4.3   | 39.2 ± 3.7   | 0.23 | 40.2 ± 4.9   | 40.7 ± 4.8   | 0.66 |
| <b><i>Echocardiographic Findings</i></b> |              |              |      |              |              |      |
| LVEDVi (ml/m <sup>2</sup> )              | 41.7 ± 10.6  | 48.4 ± 12.3  | 0.02 | 54.4 ± 19.8  | 59.5 ± 17.1  | 0.27 |
| LVESVi (ml/m <sup>2</sup> )              | 17.3 ± 7.3   | 18.1 ± 6.5   | 0.64 | 23.0 ± 14.2  | 27.2 ± 11.8  | 0.20 |
| Mean WT (cm)                             | 1.19 ± 0.26  | 1.18 ± 0.17  | 0.88 | 1.11 ± 0.13  | 1.08 ± 0.13  | 0.31 |
| LV mass index (g/m <sup>2</sup> )        | 103.9 ± 34.2 | 99.5 ± 25.8  | 0.57 | 102.7 ± 20.7 | 106.2 ± 25.8 | 0.54 |

|                                |             |             |      |             |             |      |
|--------------------------------|-------------|-------------|------|-------------|-------------|------|
| LVH                            | 14 (41%)    | 11 (37%)    | 0.71 | 15 (42%)    | 16 (52%)    | 0.42 |
| RWT                            | 0.53 ± 0.15 | 0.51 ± 0.09 | 0.51 | 0.47 ± 0.09 | 0.44 ± 0.08 | 0.10 |
| LVEF (%)                       | 59.4 ± 8.4  | 63.1 ± 5.9  | 0.05 | 59.9 ± 8.1  | 55.6 ± 8.3  | 0.04 |
| e' (cm/sec)                    | 6.4 ± 2.0   | 7.2 ± 2.5   | 0.19 | 5.4 ± 1.5   | 5.4 ± 1.5   | 0.98 |
| E/e' (cm/sec)                  | 15.8 ± 7.1  | 15.6 ± 7.3  | 0.89 | 13.9 ± 5.5  | 12.6 ± 3.1  | 0.27 |
| LA volume (ml/m <sup>2</sup> ) | 63.9 ± 21.5 | 63.2 ± 20.0 | 0.90 | 52.7 ± 19.4 | 57.4 ± 18.2 | 0.33 |

Supplemental Figure

Study Participants with LVEF  $\geq 55$  (N=259)

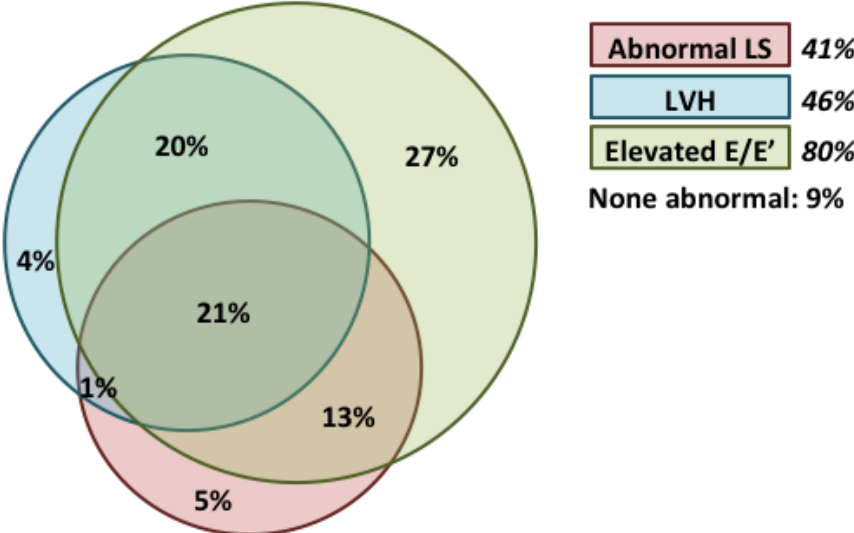

Supplement: NIHMS695344-supplement-Supplemental_Material.pdf [file NIHMS695344-supplement-Supplemental_Material.pdf]
